# Supplementary material for: Excitonic Insulator Enabled Ultrasensitive Terahertz Photodetection with Efficient Low‐Energy Photon Harvesting
Source: PubMed Central journal article supplement (PMC9798984; doi:10.1002/advs.202204580), 2022-11-10
Supplement: ADVS-9-2204580-s001.pdf [file ADVS-9-2204580-s001.pdf]

## Supporting Information

for *Adv. Sci.*, DOI 10.1002/advs.202204580

Excitonic Insulator Enabled Ultrasensitive Terahertz Photodetection with Efficient Low-Energy Photon Harvesting

*Zhuo Dong, Wanlong Guo, Libo Zhang, Yan Zhang, Jie Chen, Luyi Huang, Cheng Chen, Liu Yang, Zeqian Ren, Junrong Zhang, Wenzhi Yu, Jie Li, Lin Wang and Kai Zhang\**

## Supporting Information

**Excitonic Insulator Enabled Ultrasensitive Terahertz Photodetection with Efficient Low-Energy Photon Harvesting**

*Zhuo Dong, Wanlong Guo, Libo Zhang, Yan Zhang, Jie Chen, Luyi Huang, Cheng Chen, Liu Yang, Zeqian Ren, Junrong Zhang, Wenzhi Yu, Jie Li, Lin Wang, Kai Zhang\**

Dr. Z. Dong, Y. Zhang, J. Chen, Dr. L. Huang, C. Chen, L. Yang, Z. Ren, J. Zhang, Dr. J. Li, Prof. K. Zhang

CAS Key Laboratory of Nanophotonic Materials and Devices & Key Laboratory of Nanodevices and Applications, *i*-Lab

Suzhou Institute of Nano-Tech and Nano-Bionics (SINANO)

Chinese Academy of Sciences

Ruoshui Road 398, Suzhou, Jiangsu 215123, P. R. China

E-mail: kzhang2015@sinano.ac.cn

Dr. Z. Dong, Y. Zhang, C. Chen, L. Yang, J. Zhang

School of Nano-Tech and Nano-Bionics

University of Science and Technology of China

Jinzhai Road 96, Hefei, Anhui 230026, P. R. China

Dr. W. Guo, Dr. L. Zhang, Prof. L. Wang

State Key Laboratory for Infrared Physics

Shanghai Institute of Technical Physics

Chinese Academy of Sciences

500 Yu-tian Road, Shanghai 200083, China

Dr. W. Yu

Songshan Lake Materials Laboratory

Dongguan, Guangdong, 523000, P.R. China

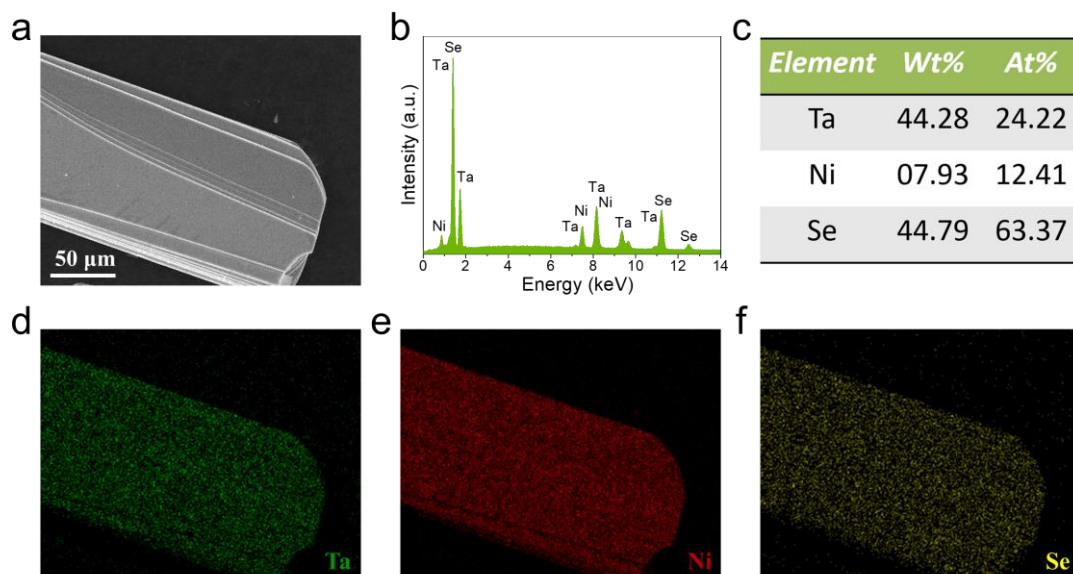

**Figure S1.** Morphology and chemical composition of the synthesized  $\text{Ta}_2\text{NiSe}_5$  crystals. (a) SEM image of a  $\text{Ta}_2\text{NiSe}_5$  crystal with characteristic layered structure. (b) EDX spectroscopy of the crystal in (a), demonstrating the existence of Ta, Ni, and Se element. (c) The atomic ratio of Ta/Ni/Se elements for the  $\text{Ta}_2\text{NiSe}_5$ . The atomic ratio of Ta:Ni:Se is approximately 2:1:5. (d-f) Corresponding EDX elemental mapping images of Ta, Ni, and Se, respectively.

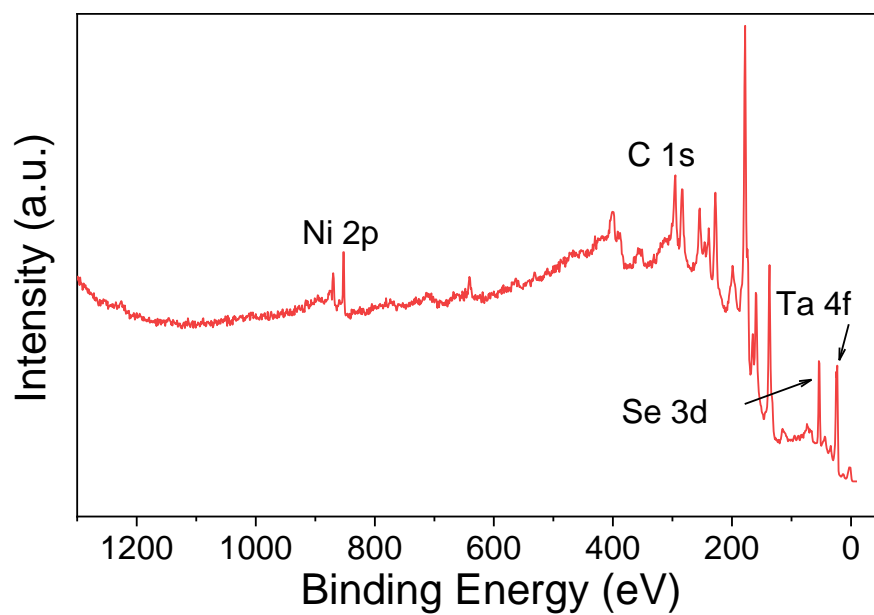

**Figure S2.** Wide-scan XPS spectrum of the synthesized Ta<sub>2</sub>NiSe<sub>5</sub> crystal. It clearly shows the Ta 4f, Ni 2p, and Se 3d signals.

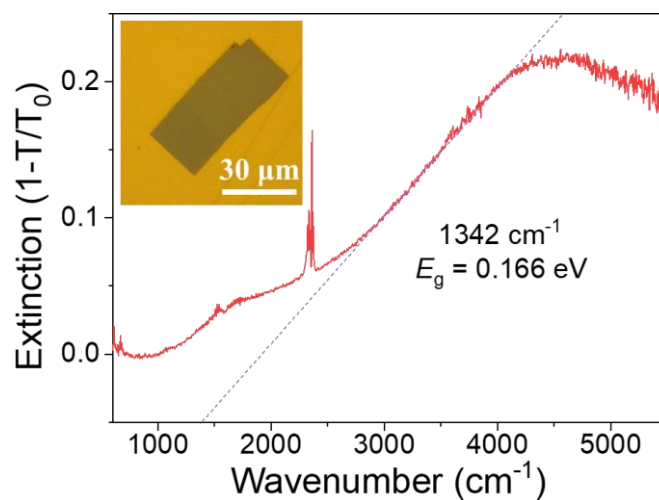

**Figure S3.** FTIR absorption spectrum of the mechanically exfoliated Ta<sub>2</sub>NiSe<sub>5</sub> nanosheets. Insert is the optical microscope image of the Ta<sub>2</sub>NiSe<sub>5</sub> nanosheets on the gold substrate. This absorption spectrum shows that the optical band gap of Ta<sub>2</sub>NiSe<sub>5</sub> is ~0.166 eV at room temperature.

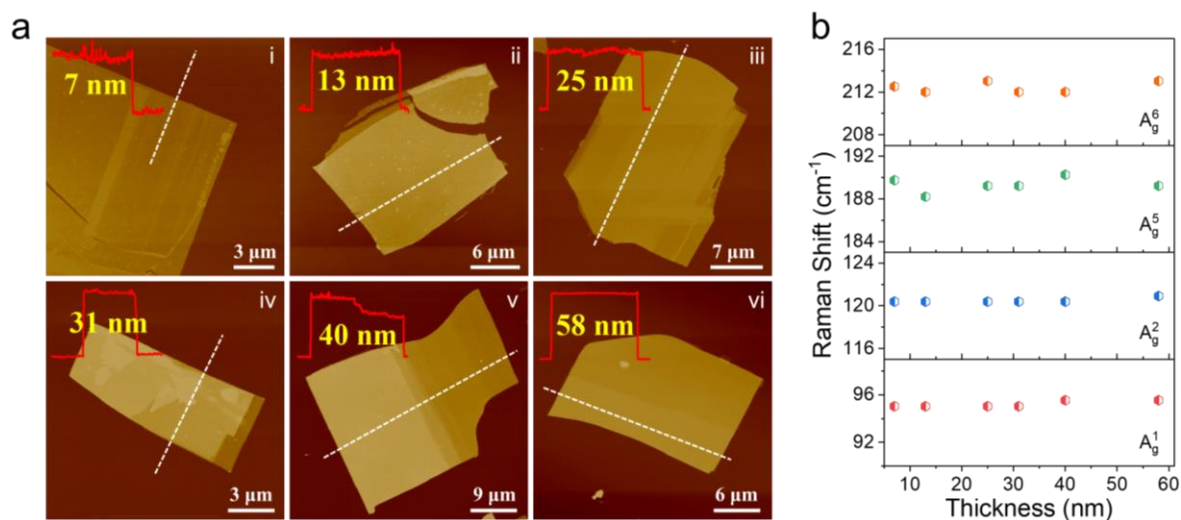

**Figure S4.** AFM images and Raman spectra of ultrathin  $Ta_2NiSe_5$  crystals at different thicknesses. (a) AFM images of ultrathin  $Ta_2NiSe_5$  nanoflakes at i) 7 nm, ii) 13 nm, iii) 25 nm, iv) 31 nm, v) 40 nm, and vi) 58 nm. (b) Frequencies of Raman modes as a function of the thickness of nanoflakes. All samples show the two strong Raman peaks at  $\sim 97$  and  $\sim 122$   $cm^{-1}$ , which are present only in the monoclinic structure. This result can further prove that the EI phase exists in the  $Ta_2NiSe_5$  with different thickness.

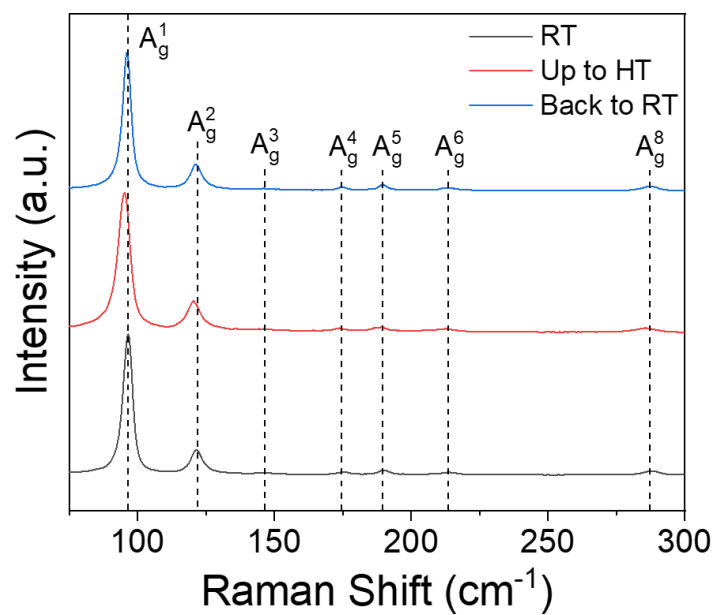

**Figure S5.** Raman spectra of Ta<sub>2</sub>NiSe<sub>5</sub> nanoflake at different temperatures. As the temperature increases, the characteristic peaks have an obvious red shift, which is related to the second-order phase transition of Ta<sub>2</sub>NiSe<sub>5</sub>.

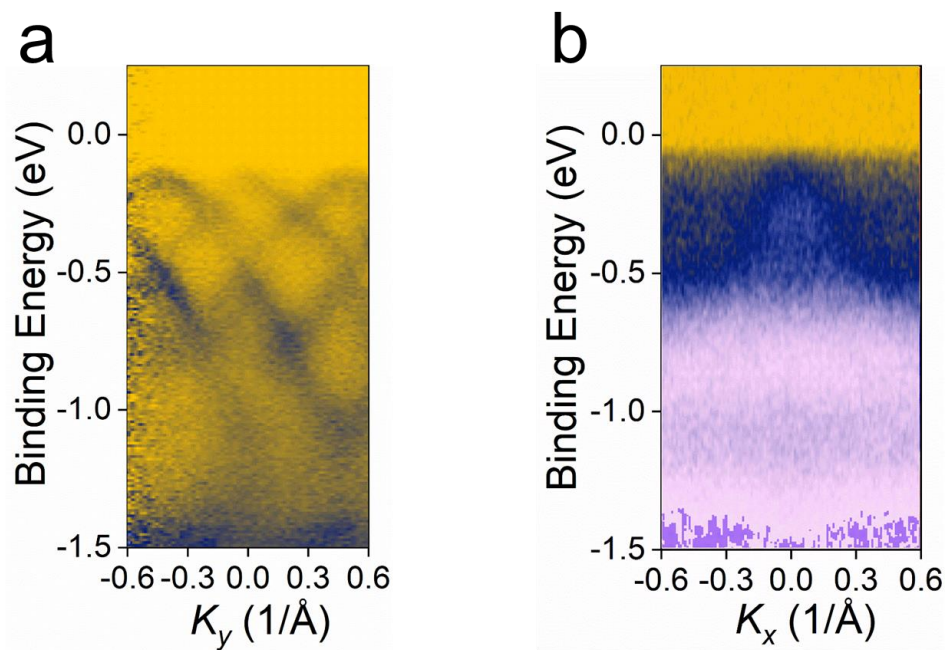

**Figure S6.** Band structure of the Ta<sub>2</sub>NiSe<sub>5</sub> single crystal measured by ARPES at  $T = 300$  K along the  $\bar{\Gamma}$ - $\bar{Y}$  direction (a) and at  $T = 350$  K along the  $\bar{\Gamma}$ - $\bar{X}$  direction (b). It can be seen that the valence band flattening disappears at  $T = 350$  K.



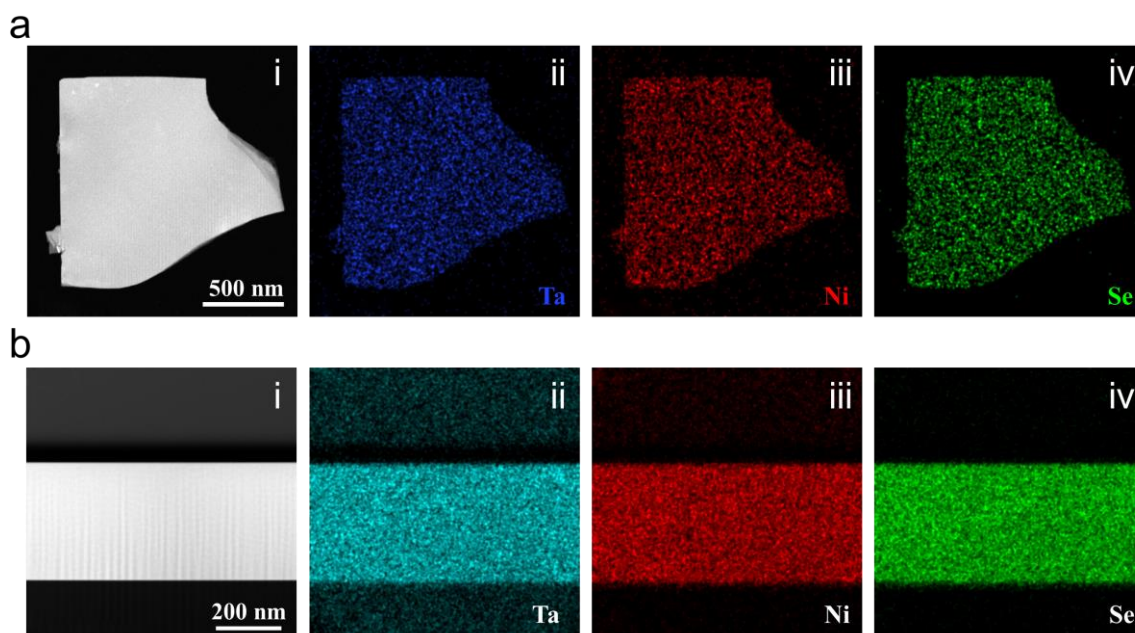

**Figure S7.** Low-magnification top surface (a) and (b) cross-section HAADF-STEM images of the Ta<sub>2</sub>NiSe<sub>5</sub> nanosheet and corresponding EDX element mapping images of Ta, Ni, and Se.

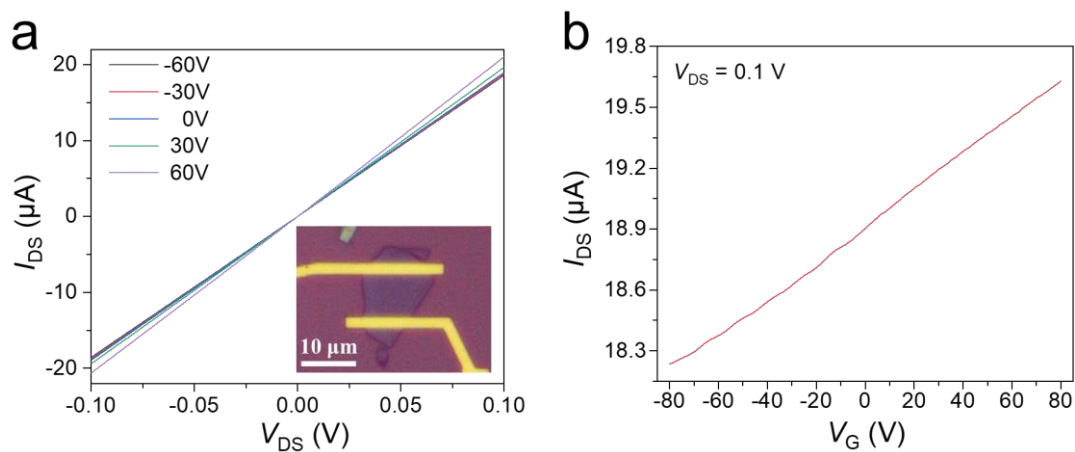

**Figure S8.** Electrical properties of the FET fabricated with the  $\text{Ta}_2\text{NiSe}_5$  nanosheet. (a) Output characteristics of  $\text{Ta}_2\text{NiSe}_5$  FET by sweeping the gate voltage ( $V_G$ ) from - 60 V to 60 V with steps of 30 V. It demonstrates a weak gate-control ability. Inset is the optical microscope image of the  $\text{Ta}_2\text{NiSe}_5$  FET. (b) Transfer characteristics for the  $\text{Ta}_2\text{NiSe}_5$  FET with a fixed source-drain bias  $V_{DS} = 0.1$  V. It exhibits typical *n*-type semiconductor characteristics.

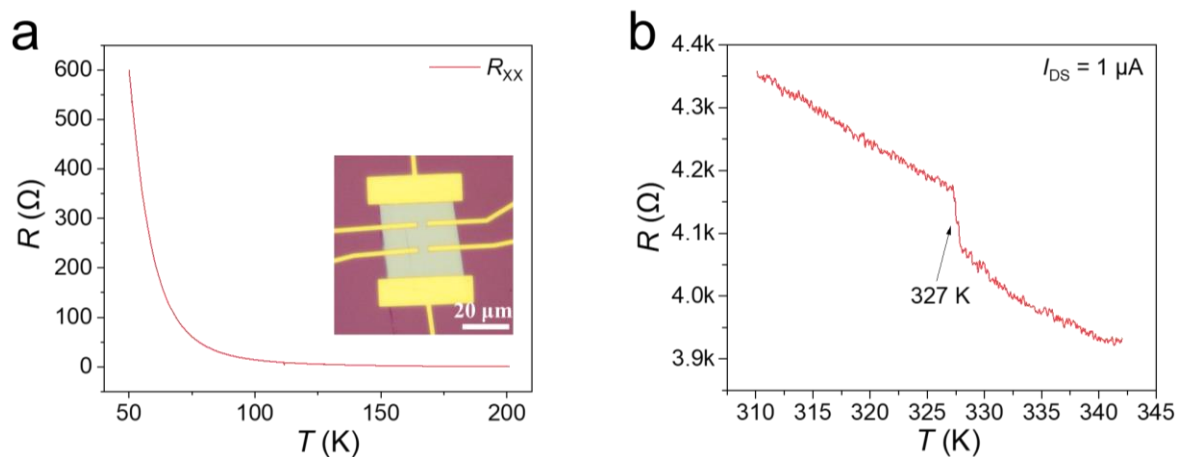

**Figure S9.** Transport properties of the  $\text{Ta}_2\text{NiSe}_5$ . (a) Temperature dependence of the longitudinal resistance  $R_{XX}$  of the  $\text{Ta}_2\text{NiSe}_5$  nanoflake. Inset is typical optical image of the  $\text{Ta}_2\text{NiSe}_5$  nanoflake-based Hall device. It can be seen that the resistance increases with the decreasing temperature, showing a typical semiconductor behavior. (b) Temperature dependence of the resistance of the  $\text{Ta}_2\text{NiSe}_5$  Hall device at fixed source-drain current  $I_{DS} = 1 \mu\text{A}$  displays an anomaly at  $T \sim 327 \text{ K}$ , which corresponds to the EI transition.

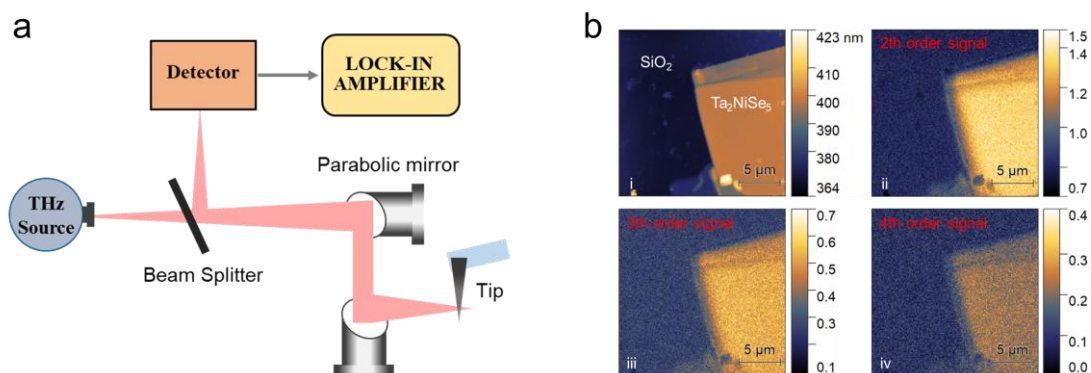

**Figure S10.** THz s-SNOM test of the Ta<sub>2</sub>NiSe<sub>5</sub> sample. (a) Schematic diagram of the THz s-SNOM experimental setup. It consists of THz source, a pair of parabolic mirrors, beam splitter, THz detector, lock-in amplifier, and an AFM tip. (b) AFM topography image (i) and the THz near-field microscopy mapping images (ii-iv) from different orders of the scattered signal (2-4th order signals) of the Ta<sub>2</sub>NiSe<sub>5</sub> nanoflake on the Si/SiO<sub>2</sub> substrate. All mapping images show the obvious THz near-field distribution of the Ta<sub>2</sub>NiSe<sub>5</sub> nanoflake and considerable optical contrast between Ta<sub>2</sub>NiSe<sub>5</sub> and Si/SiO<sub>2</sub> substrate.

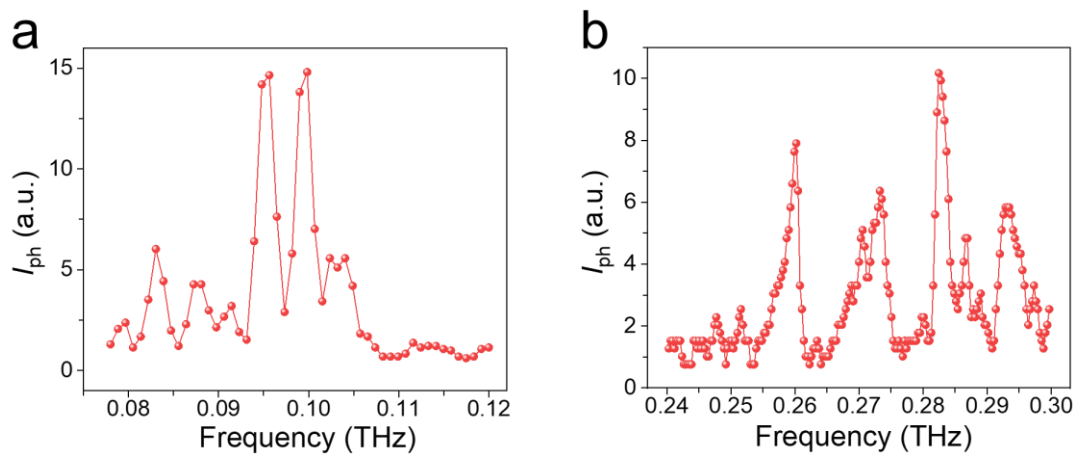

**Figure S11.** Normalized  $I_{ph}$  of the Ta<sub>2</sub>NiSe<sub>5</sub> photodetector at a frequency 0.07-0.12 THz (a) and 0.24-0.30 THz (b) at bias voltage of 0.1 V. It can be seen that the photodetector exhibits a prominent photocurrent response in the wavebands of 0.07-0.30 THz at 0.1 V bias voltage.

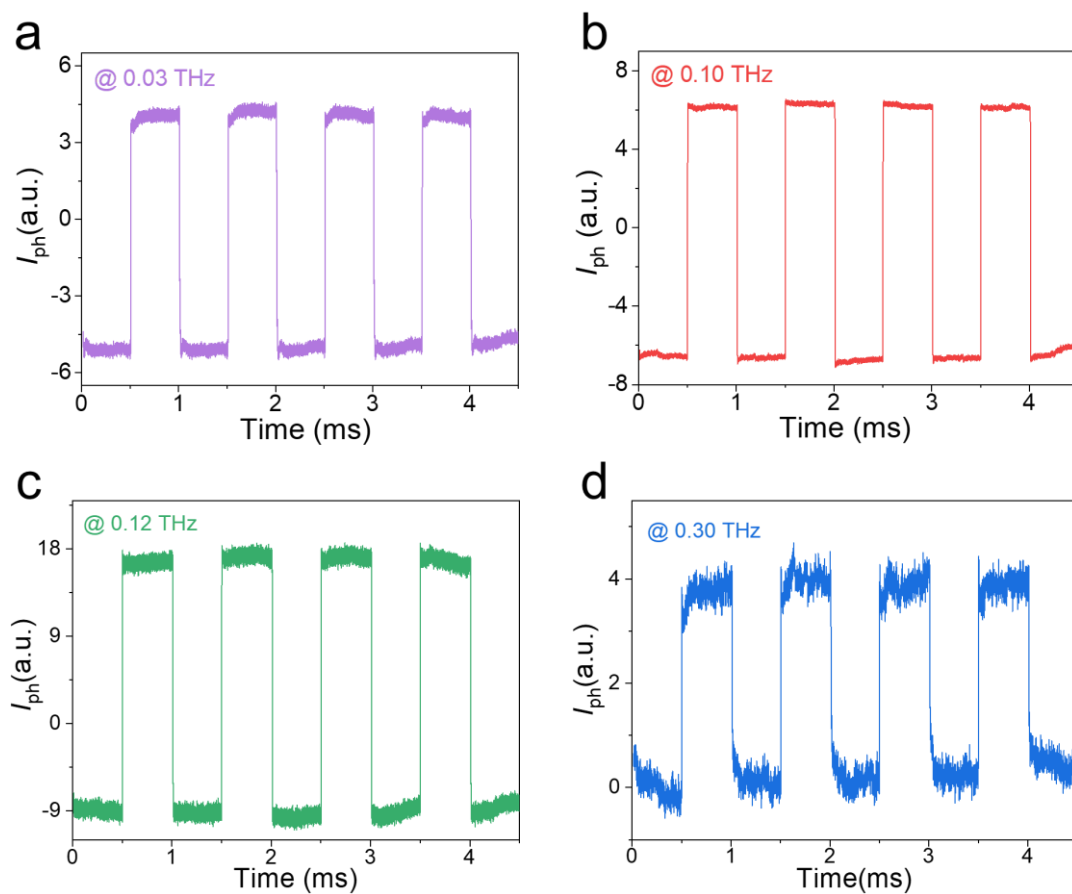

**Figure S12.** Time-resolved photoresponse spectra of the Ta<sub>2</sub>NiSe<sub>5</sub> photodetector irradiated with 0.03 (a), 0.10 (b), 0.12 (c), and 0.30 THz (d) wave at 0.1 V bias voltage. It can be seen that the Ta<sub>2</sub>NiSe<sub>5</sub> photodetector displays the fast and stable response waveform at 0.03, 0.10, 0.12, and 0.30 THz, which further illustrates the broadband detection characteristics.

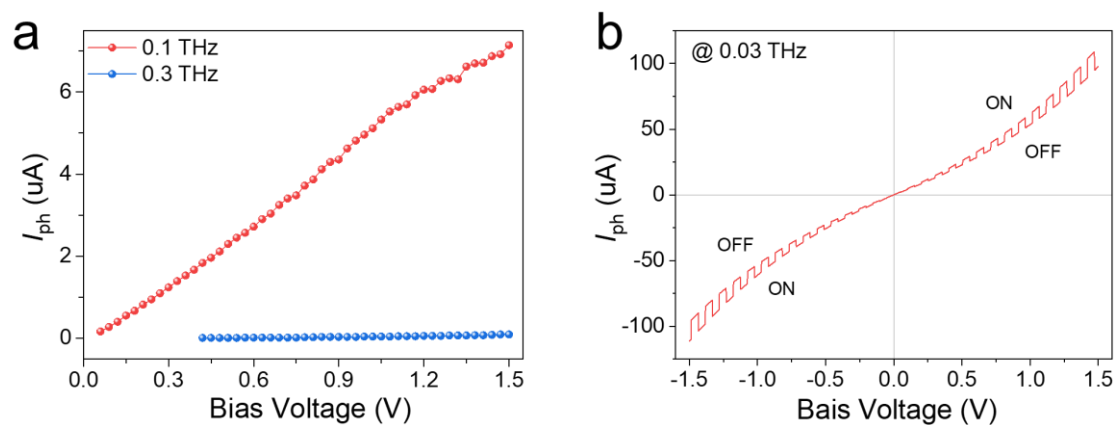

**Figure S13.** (a) The evolution of  $I$ - $V$  curve for the  $\text{Ta}_2\text{NiSe}_5$  photodetector under “ON/OFF” modulated radiation at 0.03 THz. The  $I_{ph}$  of the photodetector grows with increasing bias voltage, and still maintains a stable response waveform. (b) Bias voltage-dependent  $I_{ph}$  of the photodetector irradiated with 0.10 and 0.30 THz wave.

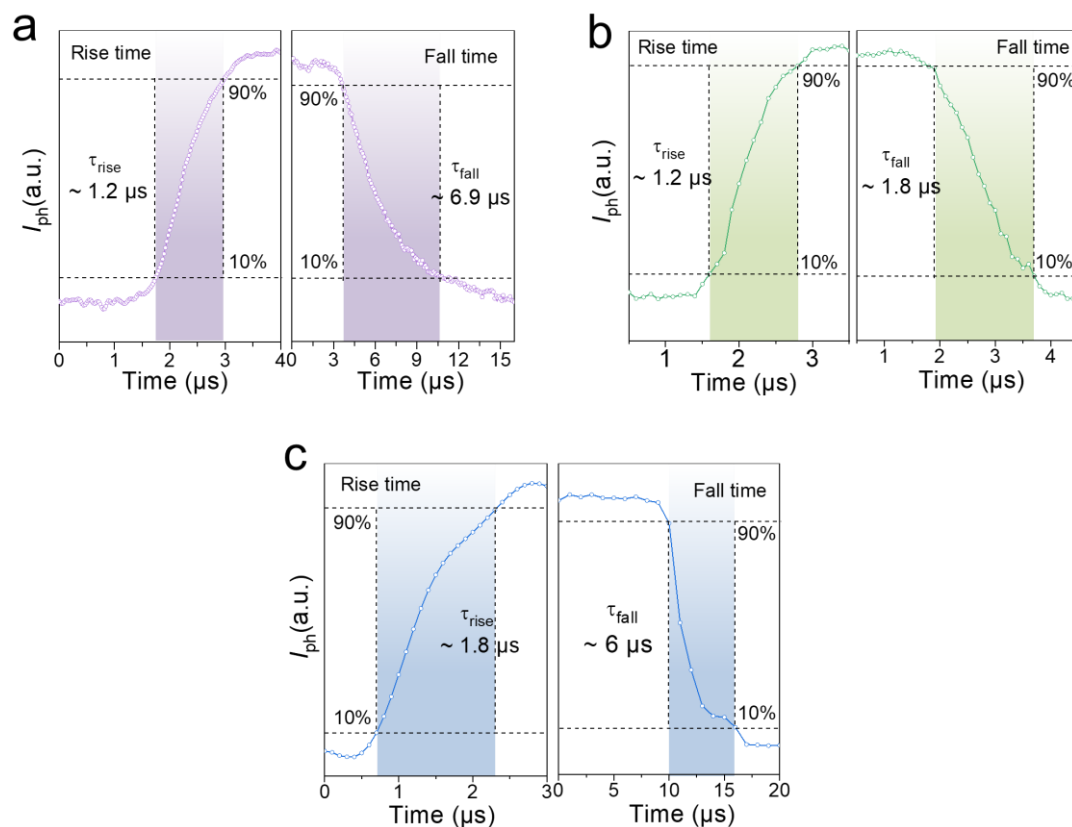

**Figure S14.** Rising/falling times for the Ta<sub>2</sub>NiSe<sub>5</sub> photodetector under 0.03 (a), 0.12 (b), and 0.30 THz (c) illumination at a bias voltage of 0.1 V.
